# Supplementary material
Source: Springer Nature journal article supplement (https://www.springermedizin.de/resource/supplementary/12936_2013_2946_MOESM6_ESM.docx/9544690)
Supplement: MOESM6 [file 9544690]

| **Table 5. Opportunities for intervention to improve IPTp uptake** | | | |
| --- | --- | --- | --- |
|  | **Level of intervention** | | |
| **Barrier to IPTp Uptake** | **Individual** | **Community** | **Environment** |
| Understanding of MIP | Improve knowledge on cause and symptoms of malaria, risks of MIP to mother and infant.  Emphasize importance and benefits of timely treatment of malaria with ACTs, rather than herbal medicines. | Improve knowledge on cause and symptoms of malaria, risks of MIP to mother and infant.  Emphasize importance and benefits of timely treatment of malaria with ACTs, rather than herbal medicines. | Train providers on focused ANC and MIP protocols.  Develop appropriate job aids.  Provide supportive supervision to ensure protocols are followed and cases correctly managed. |
| Understanding of IPT | Improve knowledge on purpose of IPT, drug and dosage.  Develop job aid that explains dosage and timing for women given prescription for SP. | Improve knowledge on purpose of IPT, drug and dosage.  Develop brochure that explains dosage and timing for women given prescription for SP. | Improve application of IPT protocols.  Develop appropriate job aids.  Provide supportive supervision to ensure protocols are followed. |
| Costs of seeking care | Emphasize lower cost of preventing malaria compared to treating malaria or complications (such as low birth weight infant) | Emphasize lower cost of preventing malaria compared to treating malaria or complications (such as low birth weight infant) | Ensure that only allowable fees are charged. |
| Waiting time | Empower women to make timely ANC visits and apprise them of their rights to prompt attention at health centers. | Support pregnant women in making timely visit to health centers for complete ANC services. | Organize ANC services such that the same individual provides all services and in a timely manner during a visit, reducing waiting time. |
| Client-provider interaction | Improve provider IPC skills to encourage women to ask providers questions | Include messages encouraging women to ask providers questions in BCC campaigns | Train providers on interpersonal communication |
| Availability of SP on-site | NA | NA | Improve supply-chain management. May require facility-level and systems changes to distribution processes. |
